# Supplementary material for: PTEN ameliorates autoimmune arthritis through down-regulating STAT3 activation with reciprocal balance of Th17 and Tregs
Source: PubMed Central journal article supplement (PMC5052580; doi:10.1038/srep34617), 2016-10-06
Supplement: srep34617-s1.pdf [file srep34617-s1.pdf]

**PTEN ameliorates autoimmune arthritis through down-regulating STAT3 activation with reciprocal balance of Th17 and Treg**

Seung Hoon Lee<sup>1,\*</sup>, Jin-Sil Park<sup>1,\*</sup>, Jae-Kyung Byun<sup>1</sup>, JooYeon Jhun<sup>1</sup>, KyungAh Jung<sup>3</sup>, Hyeon-Beom Seo<sup>1</sup>, Young-Mee Moon<sup>1</sup>, Ho-Youn Kim<sup>1,4</sup>, Sung-Hwan Park<sup>1,4,#</sup>, and Mi-La Cho<sup>1,2,#</sup>

<sup>1</sup>The Rheumatism Research Center, Catholic Research Institute of Medical Science, The Catholic University of Korea, Seoul, South Korea

<sup>2</sup>Laboratory of Immune Network, Conversant Research Consortium in Immunologic disease, College of Medicine, The Catholic University of Korea

<sup>3</sup>Impact Biotech, Korea 505 Banpo-Dong, Seocho-Ku, 137-040, Seoul, Korea

<sup>4</sup>Division of Rheumatology, Department of Internal Medicine, School of Medicine, The Catholic University of Korea, Seoul, Republic of Korea

**Key word : PTEN, p53, Rhematoid arthritis, STAT3**

**\*These authors contributed equally to this work.**

**#These authors contributed equally to this work.**

**Sung-Hwan Park, MD, PhD**

Division of Rheumatology, Department of Internal Medicine, College of Medicine, Seoul St. Mary's Hospital, The Catholic University of Korea.

E-mail: rapark@catholic.ac.kr

**Mi-La Cho, PhD**

Conversant Research Consortium in Immunologic disease, College of Medicine, The Catholic University of Korea, Seoul, Korea 505 Banpo-Dong, Seocho-Ku 137-040, Seoul, Korea.

E-mail: iammila@catholic.ac.kr

Tel: +82-2-2258-7467

Fax: +82-2-599-4287

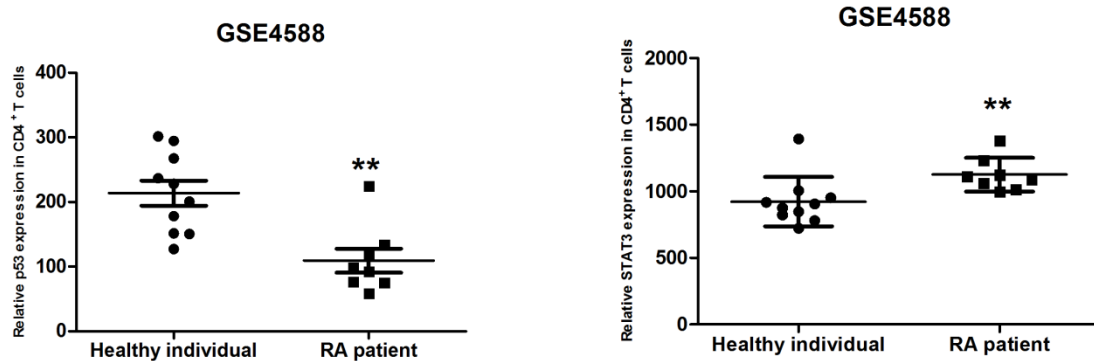

Supplementary figure 1. Gene expression of STAT3 and p53 in CD4+ T cells sorted from peripheral blood mononuclear cells of healthy individual (n = 10) or RA patients (n = 8).

Data are presented as mean ± SD (\*P < 0.05, \*\*P < 0.03).

| Gene           | Sense primer (5'-->3')          | Antisense primer (3'-->5')      |
|----------------|---------------------------------|---------------------------------|
| PTEN           | AAT TCC CAG TCA GAG GCG CTA TGT | GAT TGC AAG TTC CGC CAC TGA ACA |
| IL-17A         | CCT CAA AGC TCA GCG TGT CC      | GAG CTC ACT TTT GCG CCA AG      |
| CCL20          | CAG CTG TTG CCT CTC GTA CA      | CAC CCA GTT CTG CTT TGG AT      |
| ROR $\gamma$ t | TGT CCT GGG CTA CCC TAC TG      | GTC CAG GAG TAG GCC ACA TT      |
| BATF           | GAC AAG AAG GGC GAT GCT AC      | GGC CTT AAG TCC CTC TGA CC      |
| RUNX1          | TAC CTG GGA TCC ATC ACC TC      | GAC GGC AGA GTA GGG AAC TG      |
| Foxp3          | GGC CCT TCT CCA GGA CAG A       | GCT GAT CAT GGC TGG GTT GT      |
| SOCS3          | CCT TTG ACA AGC GGA CTC TC      | GCC AGC ATA AAA ACC CTT CA      |
| Bcl2           | GCATCCCAGCCTCCGTTAT             | TGAGTACCTGAACCGGCATCT           |
| $\beta$ -actin | GAA ATC GTG CGT GAC ATC AAA G   | TGT AGT TTC ATG GAT GCC ACA G   |

Supplementary table 1. PCR primer sequence used in this study.
